# Supplementary material for: Solvents control over the degree of interpenetration in metal-organic frameworks and their high sensitivities for detecting nitrobenzene at ppm level
Source: Royal Society of Chemistry journal article supplement (doi:10.1039/c2jm32066e), 2012-01-01

## Supporting Information

Solvents control over the degree of interpenetration in metal-organic frameworks and their high sensitivities for detecting nitrobenzene at ppm level

*Min Guo, Zhong-Ming Sun\**

State Key Laboratory of Rare Earth Resource Utilization, Changchun Institute of Applied Chemistry,  
Chinese Academy of Sciences, 5625 Renmin Street, Changchun, Jilin 130022, P.R. China.

**Figure S1.** Solid-state emission spectra of L1 ( $\lambda_{\text{ex}} = 350$  nm) and L2 ligand ( $\lambda_{\text{ex}} = 282$ ).

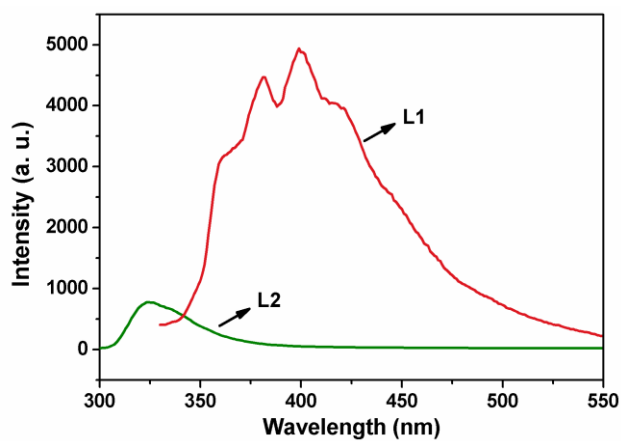

**Figure S2.** Solid-state spectra of **1'** (red,  $\lambda_{\text{ex}} = 246$  nm) and **2** (green,  $\lambda_{\text{ex}} = 246$  nm) regenerated from nitrobenzene emulsion.

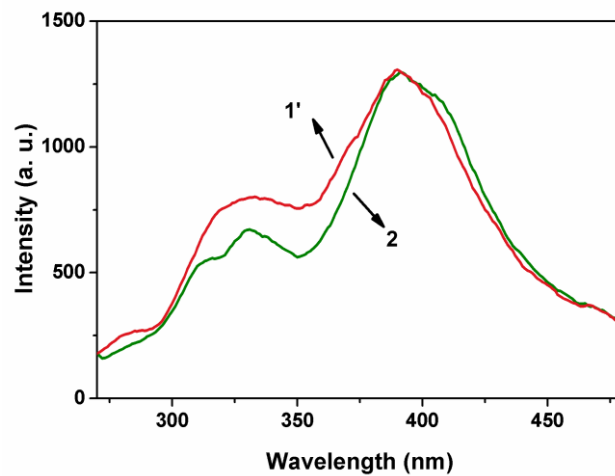

Supplement: c2jm32066e.pdf [file c2jm32066e.pdf]
